# Supplementary material for: Index of contractile asymmetry improves patient selection for CRT: a proof-of-concept study
Source: Springer Nature journal article supplement (doi:10.1186/s12947-019-0170-2), 2019-10-10
Supplement: MOESM4 [file 17260064]

**Appendix E: Receiver operating characteristics plots of multivariable models containing age, renal function, and either ICA4 or classical LBBB pattern.**

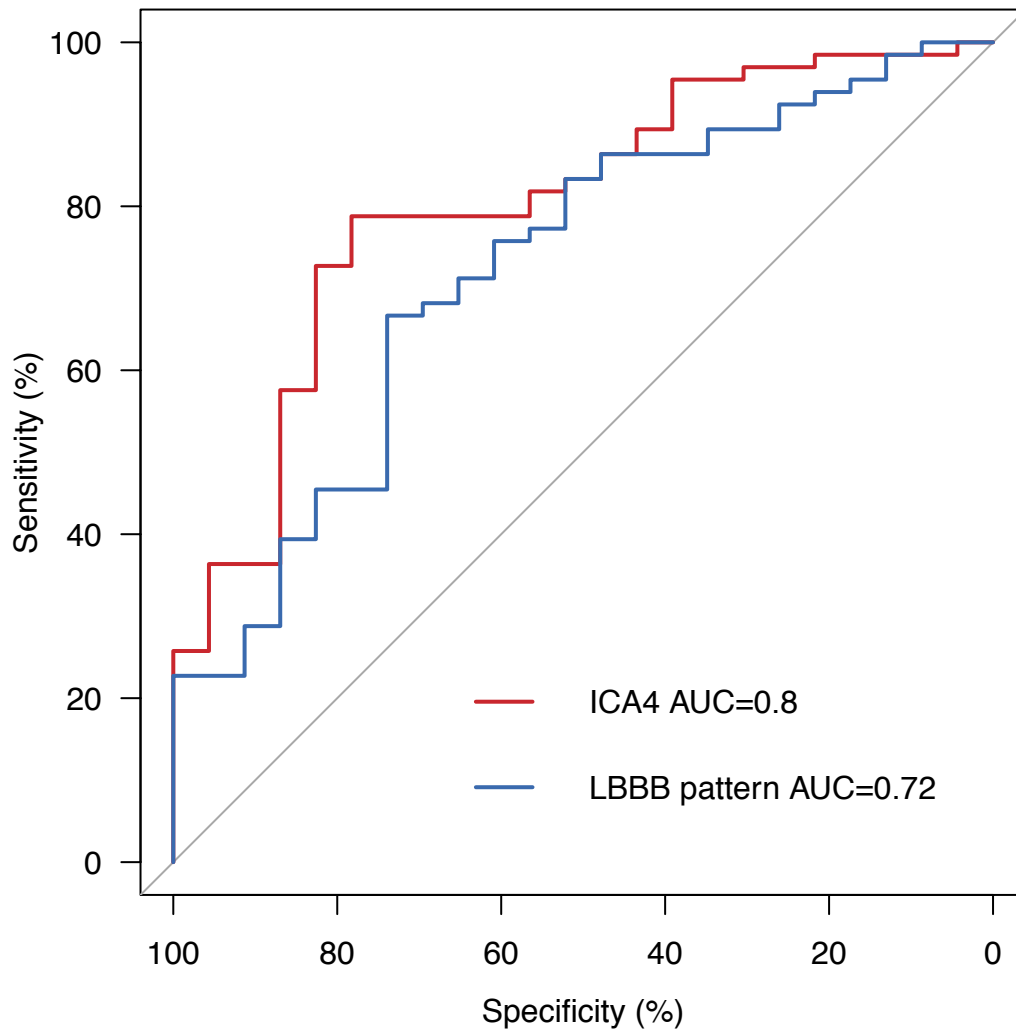

AUC, area under curve; ICA4, index of contractile asymmetry in left ventricular sector 4; LBBB, left bundle branch block.
